# Supplementary material
Source: PubMed Central journal article supplement (PMC3382069)

Figure S1

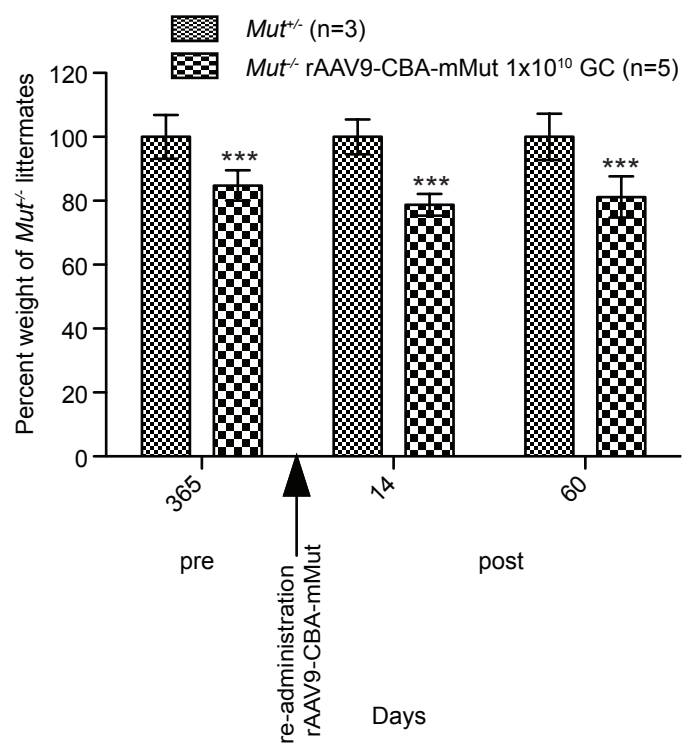

Supplement: NIHMS304399-supplement-1.pdf [file NIHMS304399-supplement-1.pdf]

Figure S2

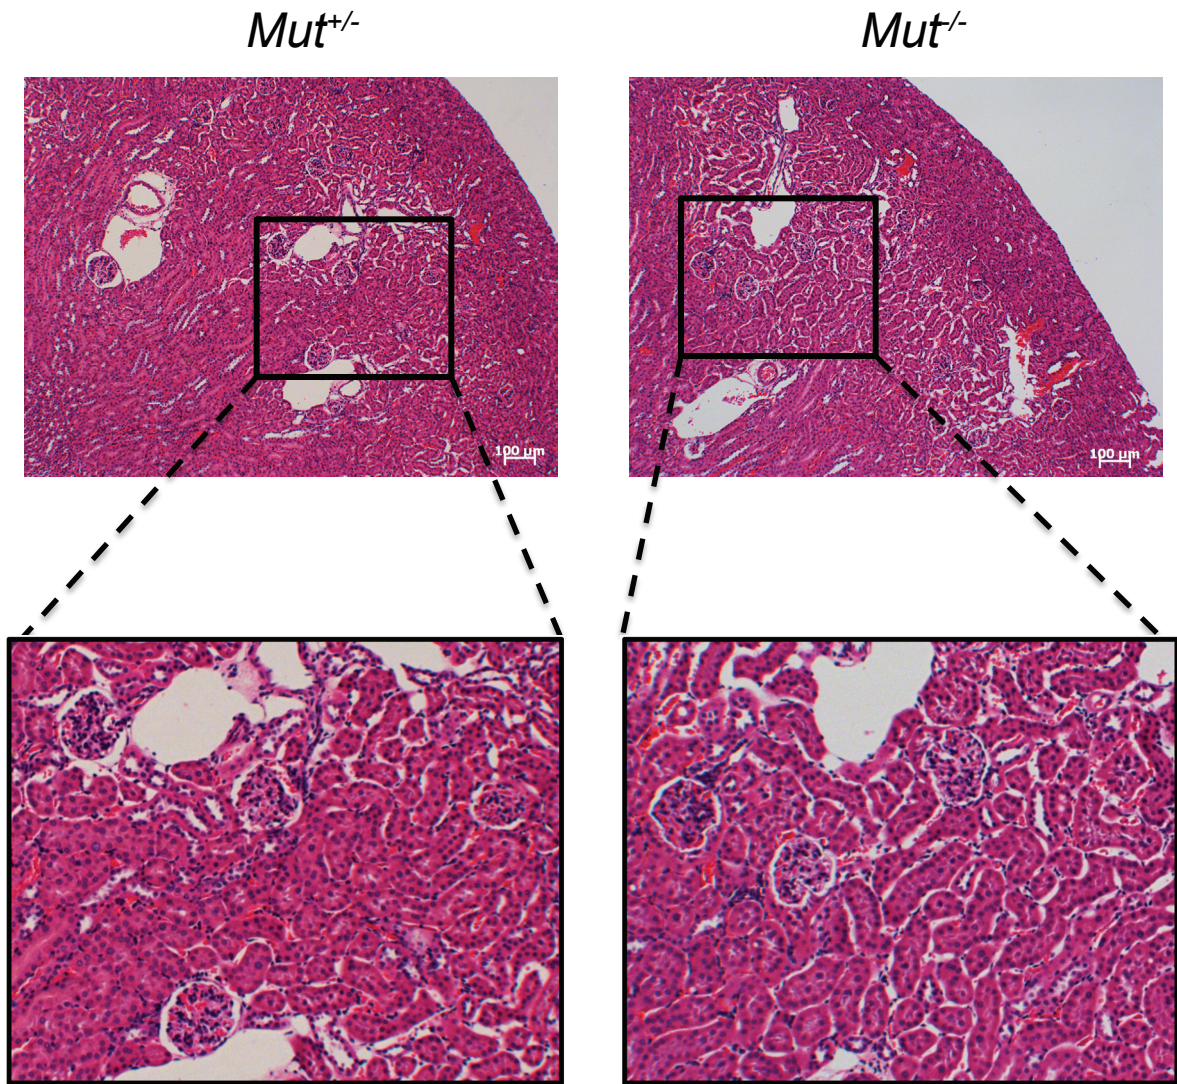

Supplement: NIHMS304399-supplement-2.pdf [file NIHMS304399-supplement-2.pdf]

Figure S3

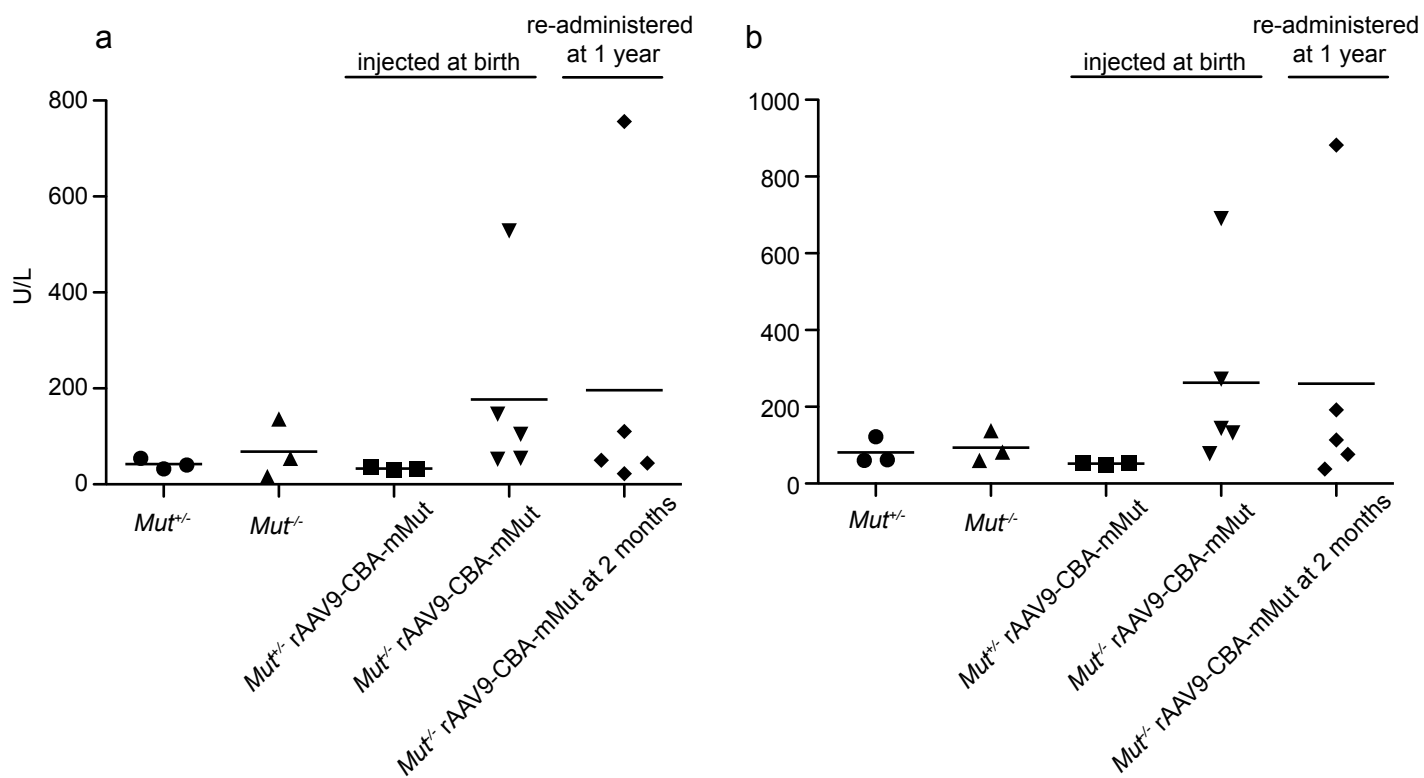

Supplement: NIHMS304399-supplement-3.pdf [file NIHMS304399-supplement-3.pdf]
